# Supplementary material for: Influence of solute association on the phase behavior of 12-hydroxystearic acid/n-alkane solutions
Source: Royal Society of Chemistry journal article supplement (doi:10.1039/d3sm00013c), 2023-01-01
Supplement: d3sm00013c1.xlsx [file d3sm00013c1.xlsx]

## Sheet: 12HSA - octane
Phi A	Tm
0.000578996	317.46		molar volume solvent		VB	163.6	cm^3/mol
0.000994665	321.543		molar volume 12-HSA		VA	625	cm^3/mol
0.00191908	326.797		reference volume		Vr	163.6	cm^3/mol
0.00947072	333.333		rA1=VA/Vr		rA1	3.82029
0.0188829	337.838		rB=VB/Vr		rB	1
0.0188829	337.483				delta H	100900
0.0552273	339.483		chi = A/T		A	133	K
0.0926867	341.15
0.175822	341.483
0.324699	341.817
0.449826	342.15
0.560733	343.483
0.650836	345.817
0.739868	347.15
0.816083	349.817
0.883301	351.817
0.908671	352.15
1	354.5

## Sheet: RawData
0.000578996	317.46
0.000994665	321.543
0.00191908	326.797
0.00947072	333.333
0.0188829	337.838
0.0188829	337.483
0.0552273	339.483
0.0926867	341.15
0.175822	341.483
0.324699	341.817
0.449826	342.15
0.560733	343.483
0.650836	345.817
0.739868	347.15
0.816083	349.817
0.883301	351.817
0.908671	352.15
1	354.5
